# Supplementary material
Source: HighWire-hosted journal article supplement (https://bmjopen.bmj.com/content/9/6/e023548)
Supplement: inline-supplementary-material-1 [file inline-supplementary-material-1.pdf]

## Supplementary Material

**Table 1** : List of foods and drinks recorded for the different meals during the day

| Meal      | Food/drink                |
|-----------|---------------------------|
| Breakfast | Hot drink                 |
|           | Carbohydrates             |
|           | Dairy product             |
|           | Fruit in season           |
| Lunch     | Aperitif/snacks           |
|           | Starter                   |
|           | Proteins                  |
|           | Vegetables                |
|           | Carbohydrates             |
|           | Pulse veg                 |
|           | Dairy product             |
|           | Cheese                    |
|           | Dessert                   |
|           | Hot drink                 |
|           | Cold drink                |
|           | Treat                     |
|           | Hot drink                 |
|           | Cold drink                |
| Snack     | Carbohydrates             |
|           | Dairy product             |
|           | Fruit in season           |
|           | Aperitif                  |
|           | Snacks                    |
| Dinner    | Starter                   |
|           | Proteins                  |
|           | Vegetables                |
|           | Carbohydrates             |
|           | Pulse veg                 |
|           | Dairy product             |
|           | Cheese                    |
|           | Dessert                   |
|           | Hot drink                 |
|           | Cold drink                |
|           | Number of glasses of wine |
|           | Sugar                     |
|           | Treat                     |

**Table 2** : List of variables recorded for refrigerator contents

|                  |                                                                                                                                                                                                                                            |
|------------------|--------------------------------------------------------------------------------------------------------------------------------------------------------------------------------------------------------------------------------------------|
| <b>Variables</b> | Milk; yoghurt; soured cream; cheese; tomato sauce; mayonnaise; mustard; eggs; cold meats; raw meat; raw fish; poultry; uncooked fruit; raw vegetables; desserts; pie pastry; jam; margarine; butter; water; soda; fruit juice; wine; beer. |
|------------------|--------------------------------------------------------------------------------------------------------------------------------------------------------------------------------------------------------------------------------------------|



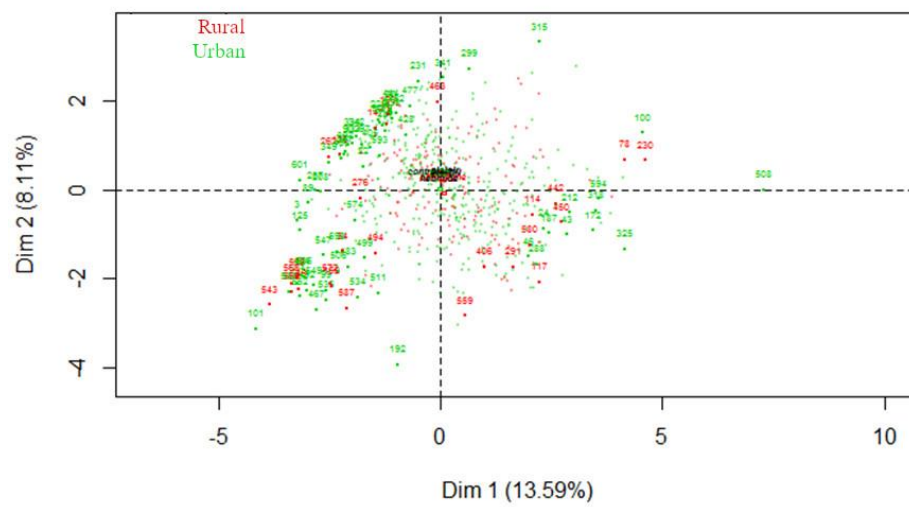

Figure 2: Description of individuals according to whether they live in urban or rural areas
